# Supplementary material for: Hydrological controls on DOC : nitrate resource stoichiometry in a lowland, agricultural catchment, southern UK
Source: Copernicus journal article supplement (doi:10.5194/hess-21-4785-2017), 2017-09-27
Supplement: Supplementary file 1 [file hess-21-4785-2017-supplement.pdf]

Supplement of Hydrol. Earth Syst. Sci., 21, 4785–4802, 2017  
<https://doi.org/10.5194/hess-21-4785-2017-supplement>  
© Author(s) 2017. This work is distributed under  
the Creative Commons Attribution 3.0 License.

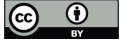

*Supplement of*

## **Hydrological controls on DOC : nitrate resource stoichiometry in a lowland, agricultural catchment, southern UK**

**Catherine M. Heppell et al.**

*Correspondence to:* Catherine M. Heppell (c.m.heppell@qmul.ac.uk)

The copyright of individual parts of the supplement might differ from the CC BY 3.0 License.

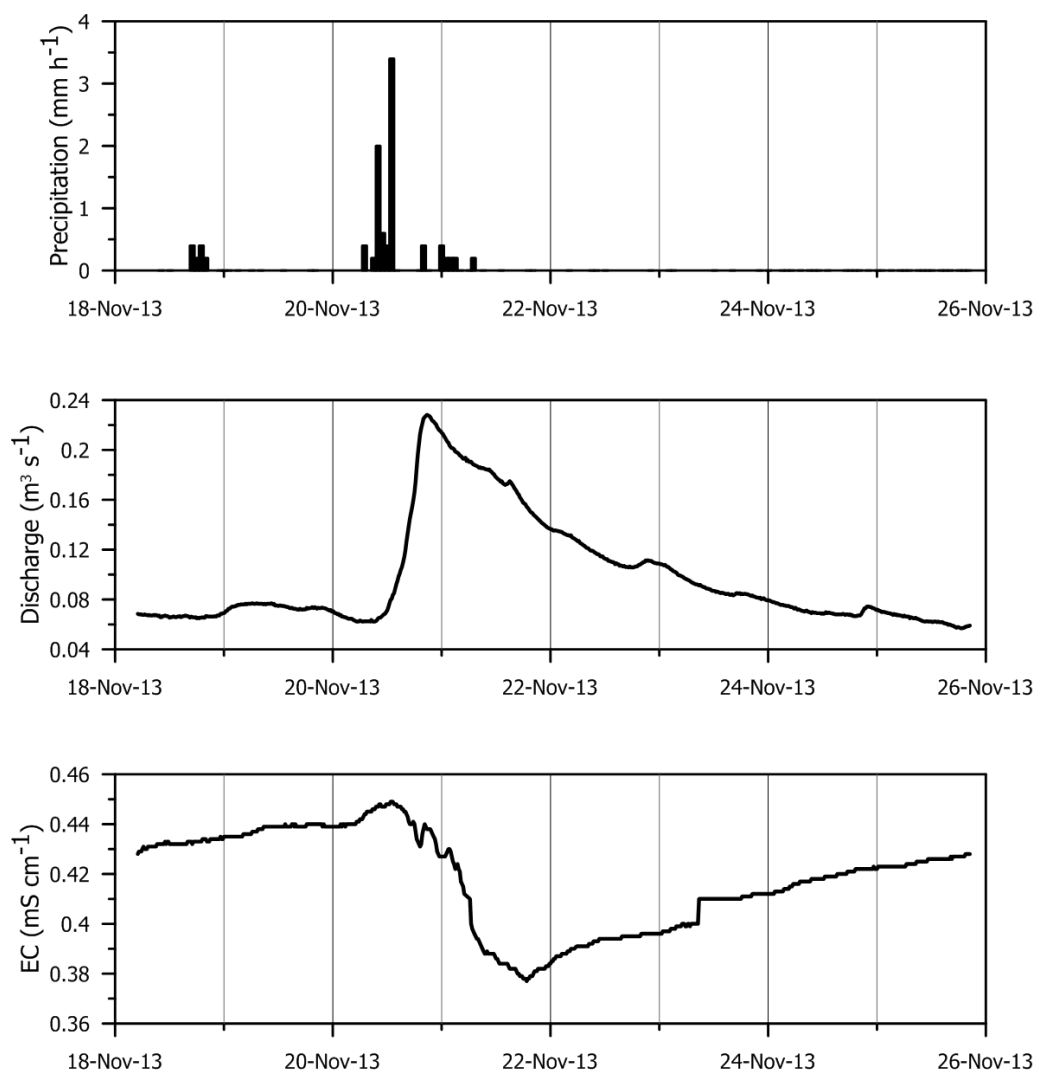

Figure S1. An example autumn storm event at Site AS illustrating the decline in electrical conductivity in surface water in response to rainfall.

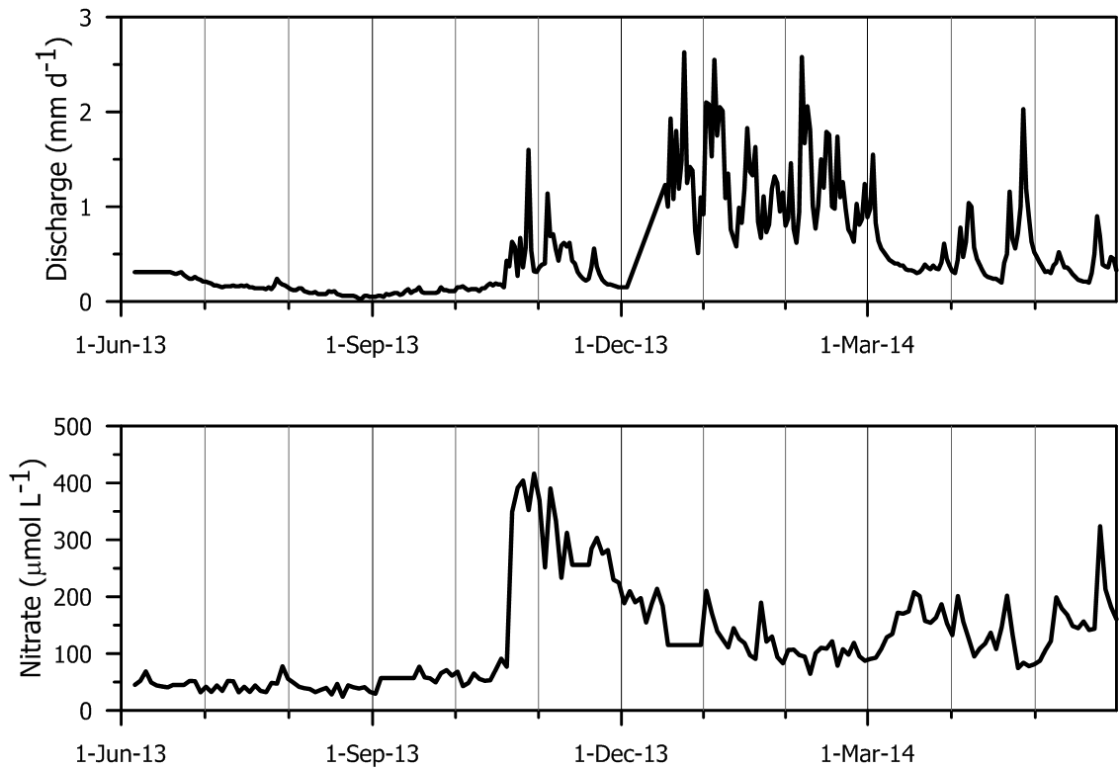

Figure S2. A time series of discharge and nitrate concentrations in surface water at Site AS, illustrating elevated nitrate concentrations recorded during Autumn 2013.
